# Supplementary material
Source: ML conference proceedings conference paper supplement (https://proceedings.neurips.cc/paper_files/paper/2017/hash/d3d80b656929a5bc0fa34381bf42fbdd-Abstract.html)
Supplement: Supplementary file [file d3d80b656929a5bc0fa34381bf42fbdd-Supplemental.zip]

# Appendix

## A Tangent Plots

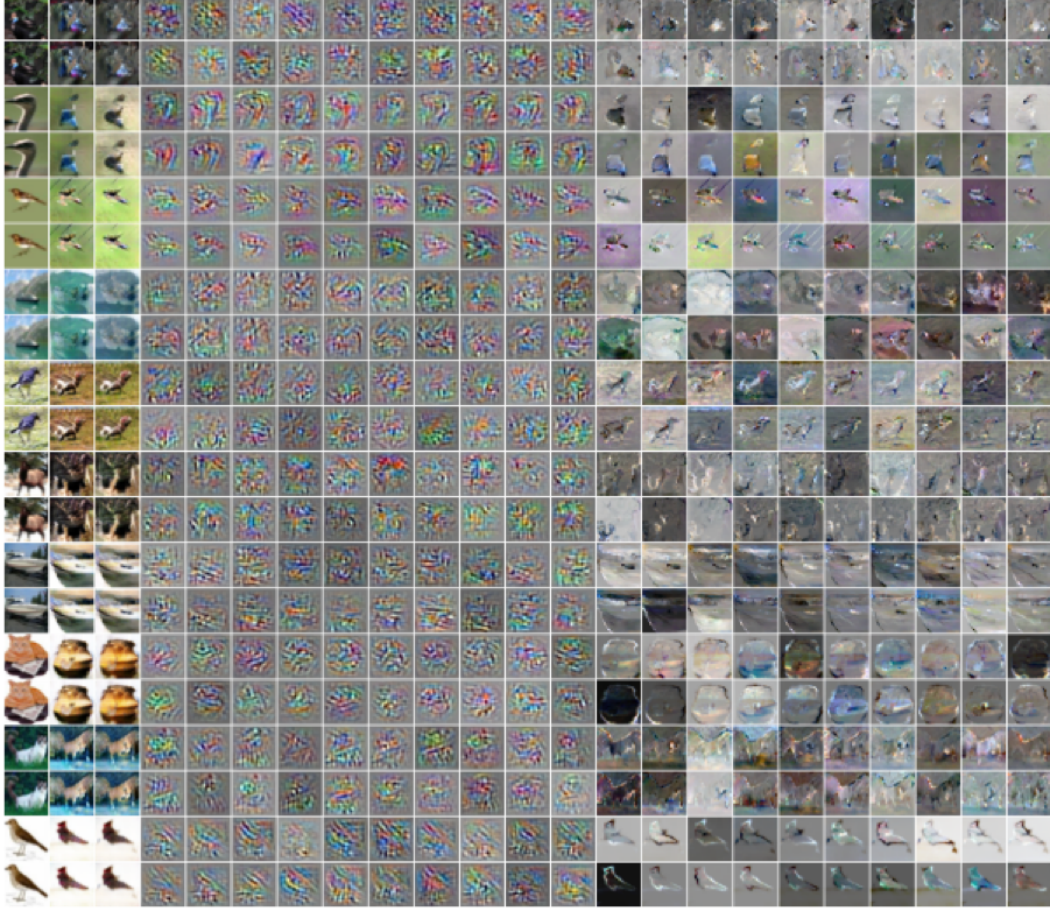

Figure 4: CIFAR10 tangents. *Odd rows*: Tangents using our method for estimating the dominant tangent space. *Even rows*: Tangents using SVD on  $J_{h(x)}g$  and  $J_xh$ . *First column*: Original image. *Second column*: Reconstructed image using  $g \circ h$ . *Third column*: Reconstructed image using  $g \circ \bar{p} \circ p \circ h$ . *Columns 4-13*: Tangents using encoder. *Columns 14-23*: Tangents using generator.

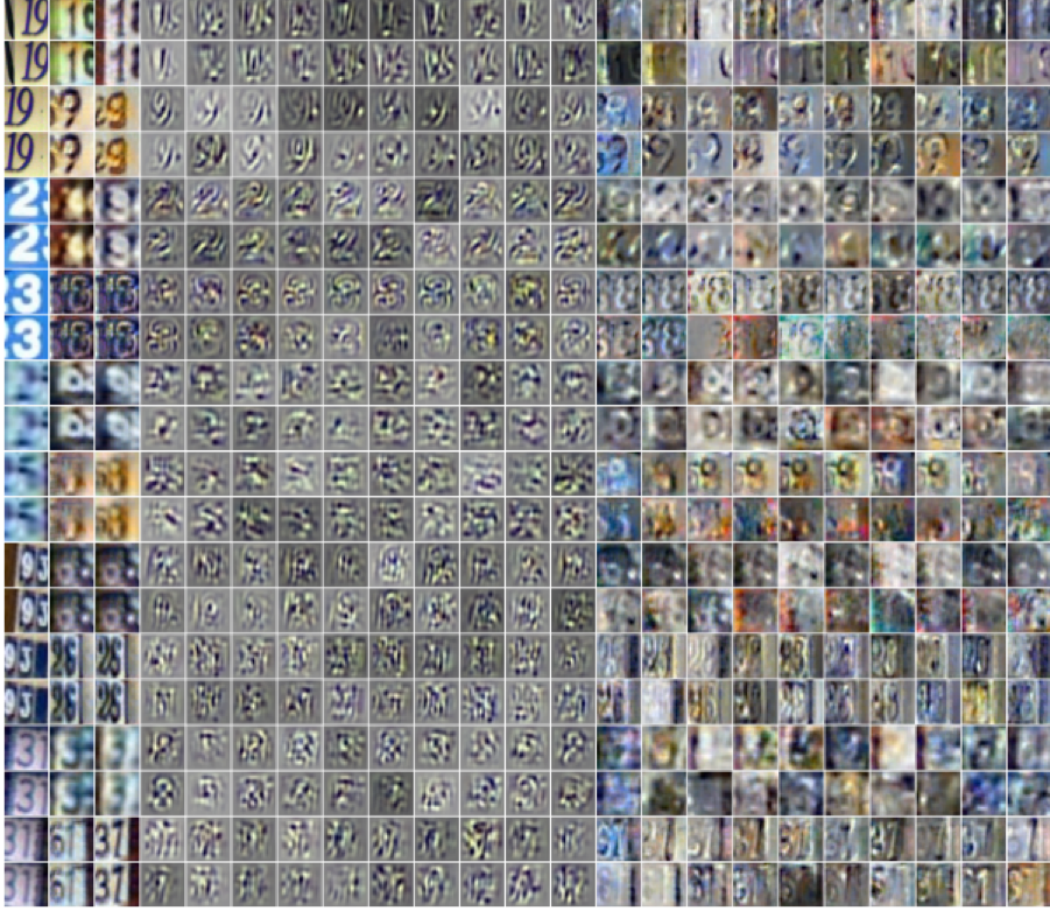

Figure 5: SVHN tangents. *Odd rows*: Tangents using our method for estimating the dominant tangent space. *Even rows*: Tangents using SVD on  $J_{h(x)}g$  and  $J_xh$ . *First column*: Original image. *Second column*: Reconstructed image using  $g \circ h$ . *Third column*: Reconstructed image using  $g \circ \bar{p} \circ p \circ h$ . *Columns 4-13*: Tangents using encoder. *Columns 14-23*: Tangents using generator.

## B Reconstruction Plots



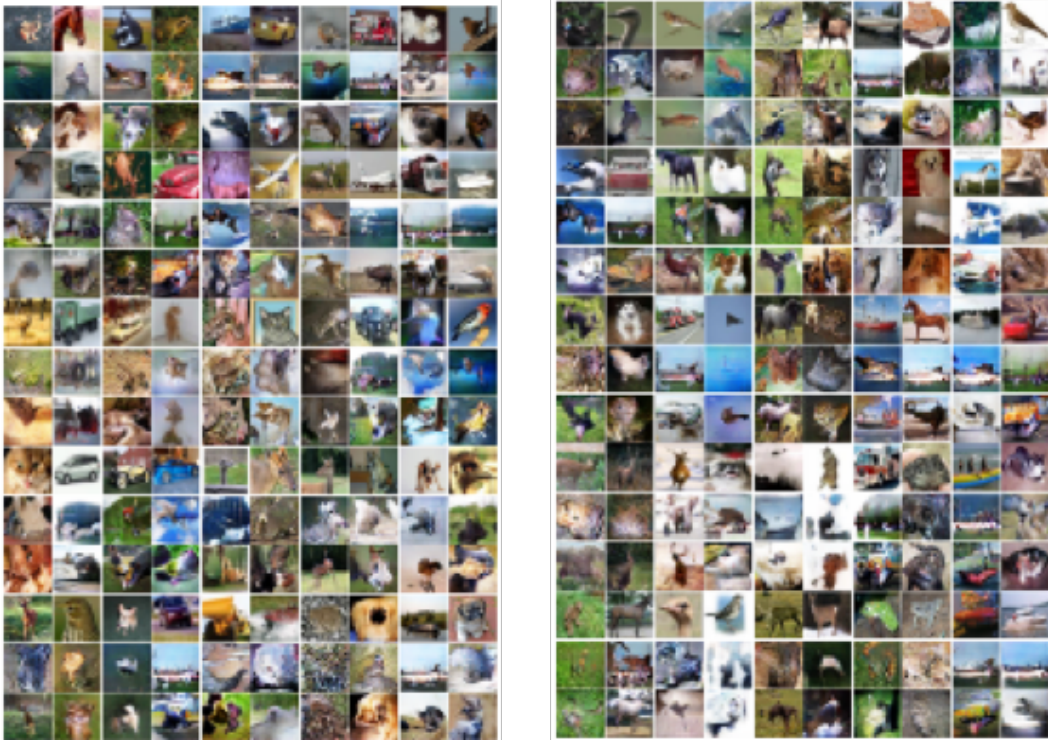

Figure 6: CIFAR10 reconstructions: Comparing BiGAN reconstructions with Augmented-BiGAN reconstructions. For  $i = 0, 1, \dots, 4$ ,  $(3i + 1)$ th row shows the original images, followed by BiGAN reconstructions in the  $(3i + 2)$ 'th row, and the Augmented-BiGAN reconstructions in the  $(3i + 3)$ 'th row. Reconstructions shown for total 100 randomly sampled images from the test set ( $10 \times 5 = 50$  images each in the left and right column) from the test set.

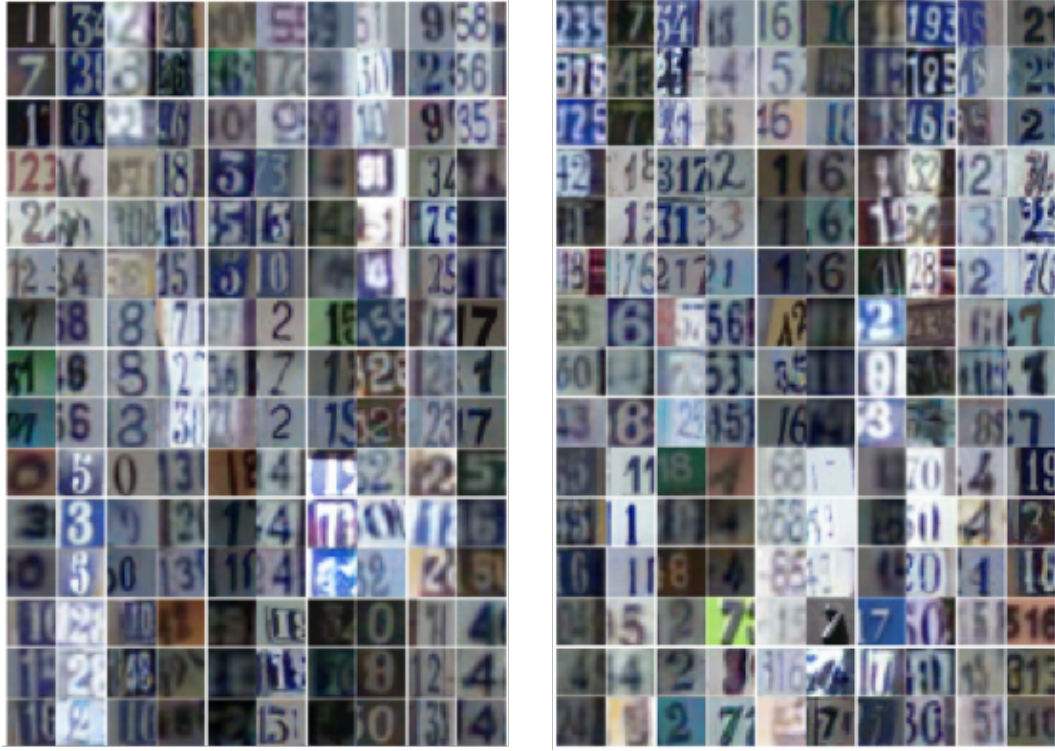

Figure 7: SVHN reconstructions: Comparing BiGAN reconstructions with Augmented-BiGAN reconstructions. For  $i = 0, 1, \dots, 4$ ,  $(3i + 1)$ th row shows the original images, followed by BiGAN reconstructions in the  $(3i + 2)$ 'th row, and the Augmented-BiGAN reconstructions in the  $(3i + 3)$ 'th row. Reconstructions shown for total 100 randomly sampled images from the test set ( $10 \times 5 = 50$  images each in the left and right column).
